# Supplementary material
Source: PubMed Central journal article supplement (PMC556236)

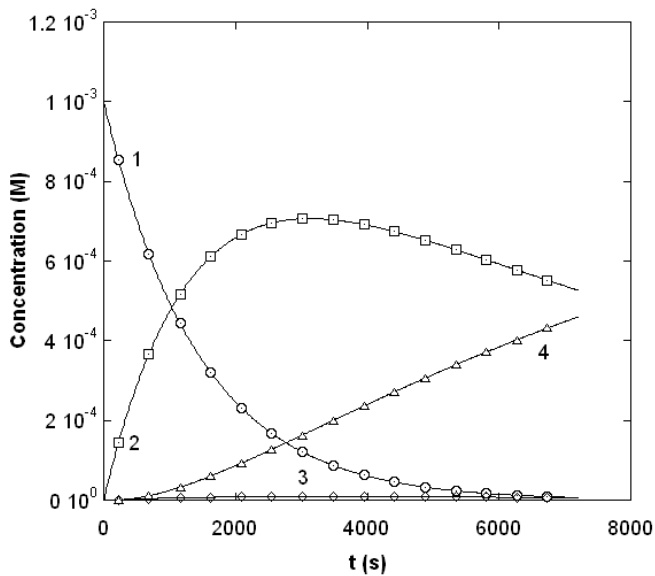

Supplement: pnas_102_15_5340__2.pdf [file pnas_102_15_5340__2.pdf]

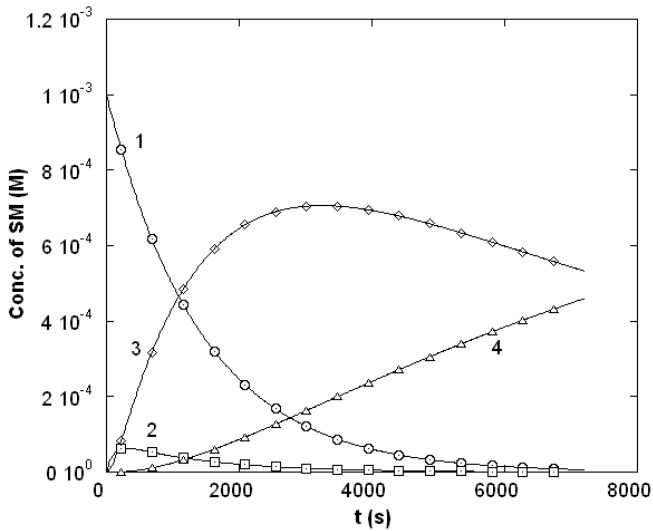

Supplement: pnas_102_15_5340__3.pdf [file pnas_102_15_5340__3.pdf]

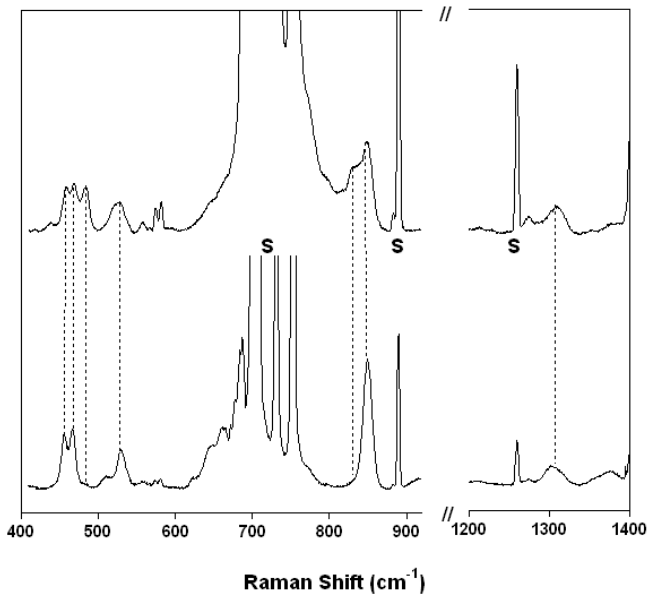

Supplement: pnas_102_15_5340__4.pdf [file pnas_102_15_5340__4.pdf]

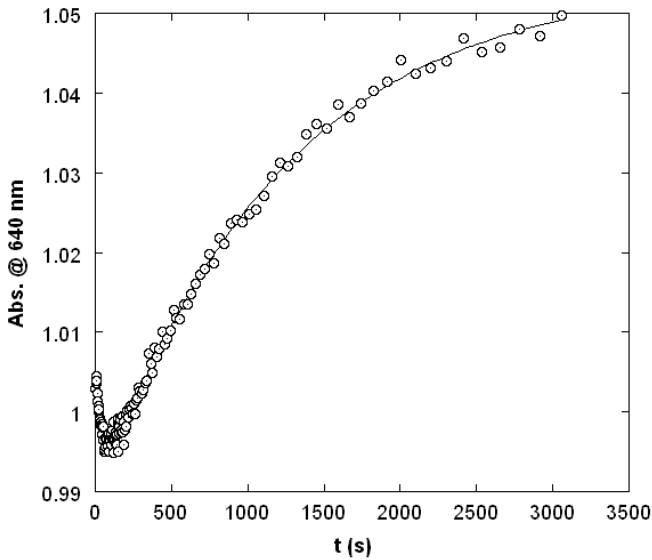

Supplement: pnas_102_15_5340__5.pdf [file pnas_102_15_5340__5.pdf]

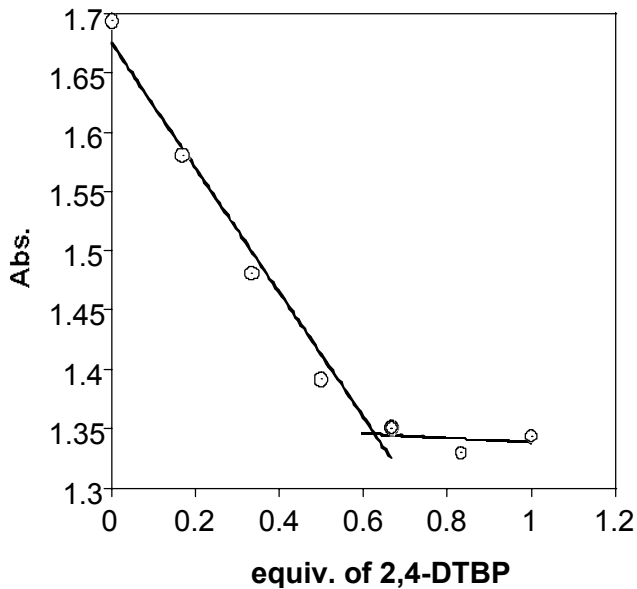

Supplement: pnas_102_15_5340__6.pdf [file pnas_102_15_5340__6.pdf]

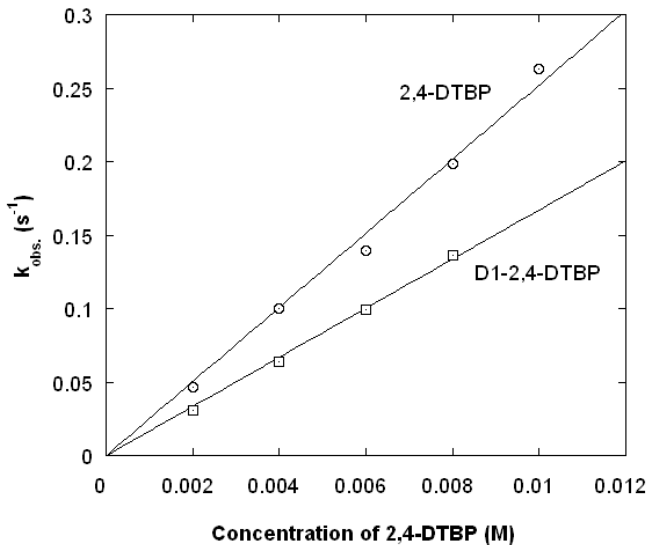

Supplement: pnas_102_15_5340__7.pdf [file pnas_102_15_5340__7.pdf]
